# Supplementary material
Source: MDPI journal article supplement (https://www.mdpi.com/1996-1073/16/16/5943)
Supplement: s1 [file s1]

## ***Supplementary Information***

### **A Theoretical Study of NH<sub>2</sub> Radical Reactions with Propane and Its Kinetic Implications in NH<sub>3</sub>-Propane Blends Oxidation**

Binod Raj Giri<sup>1,\*</sup>, Krishna Prasad. Shrestha<sup>2,\*</sup>, Tam V.-T. Mai<sup>3,4</sup>, Sushant Giri<sup>1</sup>, Mohammad Adil<sup>1</sup>, R. Thirumaleswara Naik<sup>1,5</sup>, Fabian Mauss<sup>6</sup>, and Lam K. Huynh<sup>7,8,\*</sup>

<sup>1</sup>*King Abdullah University of Science and Technology (KAUST), Physical Science and Engineering Division, Clean Combustion Research Center, Thuwal 23955-6900, Kingdom of Saudi Arabia*

<sup>2</sup>*Physics and Chemistry of Materials, Theoretical Division, Los Alamos National Laboratory, Los Alamos, New Mexico 87545, United States*

<sup>3</sup>*Institute of Fundamental and Applied Sciences, Duy Tan University, 06 Tran Nhat Duat, Tan Dinh Ward, District 1, Ho Chi Minh City, Vietnam.*

<sup>4</sup>*Faculty of Natural Sciences, Duy Tan University, Da Nang City, Vietnam*

<sup>5</sup>*Department of Mechanical Engineering, Indian Institute of Science, Bangalore, India*

<sup>6</sup>*Thermodynamics and Thermal Process Engineering, Brandenburg University of Technology, Siemens-Halske-Ring 8, 03046 Cottbus, Germany*

<sup>7</sup>*International University, Quarter 6, Linh Trung Ward, Thu Duc City, Ho Chi Minh City, Vietnam.*

<sup>8</sup>*Vietnam National University, Ho Chi Minh City, Vietnam*

\*Corresponding authors:      Binod Raj Giri ([binod.giri@kaust.edu.sa](mailto:binod.giri@kaust.edu.sa))  
                                         Krishna Prasad Shrestha ([sthakrish@gmail.com](mailto:sthakrish@gmail.com))  
                                         Lam K. Huynh ([hklam@hcmiu.edu.vn](mailto:hklam@hcmiu.edu.vn))

## Contents

|                                                                                                                                                                                                                                                                                                                                |    |
|--------------------------------------------------------------------------------------------------------------------------------------------------------------------------------------------------------------------------------------------------------------------------------------------------------------------------------|----|
| <b>Table S1:</b> Calculated M06-2X/aug-cc-pVTZ harmonic vibrational wavenumbers and rotational constants of the stationary points for the $\text{NH}_2 + \text{C}_3\text{H}_8$ reaction. Imaginary wavenumbers are denoted by <i>i</i> . .....                                                                                 | 3  |
| <b>Table S2:</b> M06-2X/aug-cc-pVTZ optimized geometries and CCSD(T)/CBS//M06-2X/aug-cc-pVTZ electronic energies corresponding to the stationary points of the $\text{NH}_2 + \text{C}_3\text{H}_8$ potential energy surface. ....                                                                                             | 5  |
| <b>Table S3:</b> High-pressure rate constant, $k_{\text{TST}}(T)$ , of $\text{NH}_2 + \text{C}_3\text{H}_8$ reaction, including HIR and Eckart tunneling corrections. Units are in $\text{cm}^3/\text{molecule/s}$ . ....                                                                                                      | 7  |
| <b>Table S4:</b> The calculated Eckart tunneling factor for the reactions of $\text{NH}_2 + \text{C}_3\text{H}_8$ over the wide temperature range of 300 – 2000 K. ....                                                                                                                                                        | 8  |
| Figure S1: Hindrance potentials for the species involved in the $\text{NH}_2 + \text{C}_3\text{H}_8$ reaction, calculated at M06-2X/cc-pVDZ level of theory. ....                                                                                                                                                              | 11 |
| <b>Figure S2:</b> Predicted total rate constant for the reaction of $\text{NH}_2 + \text{C}_3\text{H}_8 \rightarrow$ products, with (solid line) and without (dashed line) HIR treatment. ....                                                                                                                                 | 11 |
| <b>Figure S3:</b> Laminar flame speed of $\text{C}_3\text{H}_8/\text{air}$ at 1 atm and 298 K as a function of equivalence ratio. Symbols: experimental data from literature [2,3,12–14,4–11]. Line: model predictions from this work. ....                                                                                    | 12 |
| <b>Figure S4:</b> Model predicted adiabatic flame temperature (a) and maximum mole fraction of OH, H and O (b) at $\phi = 1.0$ , 1 bar and 298 K as a function of $\text{C}_3\text{H}_8$ mole fraction variation in the $\text{NH}_3/\text{C}_3\text{H}_8$ blends for the flame condition shown in Fig. 5b in manuscript. .... | 12 |
| <b>Figure S5:</b> Laminar flame speed of $\text{NH}_3$ 50% / $\text{C}_3\text{H}_8$ 50 %/air at 3 and 5 bar at 298 K. Symbols: experimental data from literature [15]. Lines: model predictions from this work. ..                                                                                                             | 13 |
| <b>Figure S6:</b> Laminar flame speed of $\text{NH}_3/\text{C}_3\text{H}_8/\text{air}$ at varying $\text{C}_3\text{H}_8$ content in fuel blend at $\phi = 1.35$ , 1 bar and 298 K. Symbols: experimental data from literature [16]. Lines: model predictions from this work. ....                                              | 13 |

**Table S1:** Calculated M06-2X/aug-cc-pVTZ harmonic vibrational wavenumbers and rotational constants of the stationary points for the  $\text{NH}_2 + \text{C}_3\text{H}_8$  reaction. Imaginary wavenumbers are denoted by *i*.

| Species                           | Rotational<br>Constants /<br>GHz | Wavenumbers / $\text{cm}^{-1}$ |                 |           |
|-----------------------------------|----------------------------------|--------------------------------|-----------------|-----------|
| <b>NH<sub>2</sub></b>             | 712.90702                        |                                |                 |           |
|                                   | 387.56034                        | 1529.8351                      | 3402.7529       | 3491.2944 |
|                                   | 251.07013                        |                                |                 |           |
| <b>NH<sub>3</sub></b>             | 299.84485                        | 1030.7854                      | 1658.8781       | 1659.6292 |
|                                   | 299.82821                        | 3508.1781                      | 3632.5664       | 3634.1800 |
|                                   | 189.10734                        |                                |                 |           |
| <b>C<sub>3</sub>H<sub>8</sub></b> |                                  | <b>217.1730</b>                | <b>277.8019</b> | 371.8257  |
|                                   |                                  | 751.4273                       | 892.1307        | 913.0741  |
|                                   |                                  | 934.0276                       | 1078.4783       | 1182.0993 |
|                                   | 29.48604                         | 1215.4603                      | 1318.3209       | 1367.0798 |
|                                   | 8.53912                          | 1406.6894                      | 1421.5207       | 1493.0354 |
|                                   | 7.54269                          | 1494.8185                      | 1499.4468       | 1511.2097 |
|                                   |                                  | 1516.2901                      | 3054.5024       | 3055.1605 |
|                                   |                                  | 3060.3544                      | 3084.4746       | 3116.5587 |
|                                   |                                  | 3127.0070                      | 3130.4892       | 3132.2473 |
|                                   |                                  | 36.5392                        | 65.1084         | 87.0185   |
|                                   |                                  | 100.0770                       | 129.0985        | 153.0454  |
| <b>PC1</b>                        |                                  | 218.0240                       | 249.8649        | 344.9326  |
|                                   |                                  | 554.0530                       | 750.3085        | 895.2919  |
|                                   |                                  | 912.2017                       | 1042.4585       | 1047.1073 |
|                                   | 12.52610                         | 1106.0554                      | 1200.3334       | 1316.1461 |
|                                   | 2.39088                          | 1332.9553                      | 1397.9887       | 1469.7810 |
|                                   | 2.10994                          | 1492.1647                      | 1498.4617       | 1510.4711 |
|                                   |                                  | 1655.4973                      | 1659.0028       | 3052.9636 |
|                                   |                                  | 3060.1393                      | 3091.9437       | 3133.5634 |
|                                   |                                  | 3135.5623                      | 3160.7880       | 3261.0796 |
|                                   |                                  | 3493.4305                      | 3610.6055       | 3629.1113 |
|                                   |                                  | 49.5905                        | 97.1527         | 115.8675  |
| <b>PC2</b>                        |                                  | 123.5631                       | 134.2506        | 168.8550  |
|                                   |                                  | 173.4903                       | 244.5497        | 364.7199  |
|                                   | 7.40900                          | 449.5450                       | 901.2400        | 940.4638  |
|                                   | 3.46584                          | 948.8380                       | 1039.8468       | 1052.2564 |
|                                   | 2.62493                          | 1152.7354                      | 1187.8084       | 1365.2722 |
|                                   |                                  | 1413.7638                      | 1418.9539       | 1476.3454 |
|                                   |                                  | 1483.6696                      | 1486.5006       | 1499.1639 |
|                                   |                                  |                                |                 |           |

|                                     |                                |                    |                 |                 |
|-------------------------------------|--------------------------------|--------------------|-----------------|-----------------|
|                                     |                                | 1656.0422          | 1660.5253       | 2994.6838       |
|                                     |                                | 2996.6024          | 3067.2977       | 3068.6950       |
|                                     |                                | 3125.9927          | 3129.1980       | 3195.6654       |
|                                     |                                | 3487.7666          | 3604.8709       | 3629.4283       |
| <b>1-C<sub>3</sub>H<sub>7</sub></b> | 32.85025<br>9.10849<br>7.86702 | <b>77.1218</b>     | <b>253.2809</b> | 374.4779        |
|                                     |                                | 452.9075           | 754.9938        | 895.9108        |
|                                     |                                | 928.4818           | 1052.5447       | 1100.7192       |
|                                     |                                | 1177.7976          | 1270.9268       | 1362.9367       |
|                                     |                                | 1409.5054          | 1469.8416       | 1473.5952       |
|                                     |                                | 1501.9520          | 1507.7481       | 2983.6254       |
|                                     |                                | 3056.9735          | 3061.6766       | 3128.6587       |
|                                     |                                | 3137.5955          | 3167.3716       | 3268.5067       |
| <b>2-C<sub>3</sub>H<sub>7</sub></b> | 37.21890<br>8.46566<br>7.54135 | <b>106.8468</b>    | <b>108.4512</b> | 317.9086        |
|                                     |                                | 384.2618           | 902.6035        | 938.4022        |
|                                     |                                | 947.8995           | 1026.5043       | 1156.8770       |
|                                     |                                | 1183.8507          | 1367.0428       | 1413.8615       |
|                                     |                                | 1419.0235          | 1472.6660       | 1481.5257       |
|                                     |                                | 1483.5723          | 1495.3811       | 2991.2398       |
|                                     |                                | 2993.6600          | 3057.2343       | 3058.0611       |
|                                     |                                | 3130.6207          | 3131.7281       | 3206.5089       |
| <b>TS1</b>                          | 9.23700<br>3.75964<br>3.01851  | 1700.8998 <i>i</i> | <b>90.7524</b>  | 111.5513        |
|                                     |                                | 130.8962           | <b>251.0703</b> | <b>364.4181</b> |
|                                     |                                | 392.6256           | 572.3804        | 685.0960        |
|                                     |                                | 790.3463           | 835.6196        | 896.9387        |
|                                     |                                | 944.6134           | 970.9582        | 1089.4705       |
|                                     |                                | 1160.3965          | 1199.9745       | 1293.0327       |
|                                     |                                | 1359.7313          | 1363.8259       | 1412.2996       |
|                                     |                                | 1445.3056          | 1461.3538       | 1484.8245       |
|                                     |                                | 1501.9225          | 1507.3742       | 1540.5151       |
|                                     |                                | 3035.5842          | 3058.6551       | 3073.0157       |
|                                     |                                | 3092.8680          | 3124.0694       | 3135.4964       |
|                                     |                                | 3167.1501          | 3420.8955       | 3511.8110       |
| <b>TS2</b>                          | 7.59724<br>4.37096<br>3.11586  | 1603.0704 <i>i</i> | <b>33.4307</b>  | 112.5074        |
|                                     |                                | 159.1708           | <b>208.1610</b> | <b>245.7770</b> |
|                                     |                                | 366.7258           | 557.1627        | 651.5642        |
|                                     |                                | 757.1098           | 880.1001        | 921.1586        |
|                                     |                                | 927.6228           | 955.6652        | 1130.4310       |
|                                     |                                | 1164.9198          | 1194.2115       | 1344.4518       |
|                                     |                                | 1383.1446          | 1400.2286       | 1413.2426       |
|                                     |                                | 1440.9451          | 1485.7519       | 1489.8440       |

|           |           |           |
|-----------|-----------|-----------|
| 1499.5263 | 1503.5800 | 1536.0301 |
| 3040.2465 | 3042.2723 | 3091.4037 |
| 3099.4362 | 3108.0627 | 3129.0775 |
| 3133.1019 | 3419.8993 | 3509.7456 |

<sup>[a]</sup> Frequency modes in **bold** corresponds to the internal rotations.

**Table S2:** M06-2X/aug-cc-pVTZ optimized geometries and CCSD(T)/CBS//M06-2X/aug-cc-pVTZ electronic energies corresponding to the stationary points of the NH<sub>2</sub> + C<sub>3</sub>H<sub>8</sub> potential energy surface.

| Species                       | Cartesian coordinates / Å |              |              |              | Electronic energies (Hartree) |
|-------------------------------|---------------------------|--------------|--------------|--------------|-------------------------------|
| NH <sub>2</sub>               | 7                         | 0.000000000  | 0.140953000  | 0.000000000  | -55.823356                    |
|                               | 1                         | 0.804325000  | -0.493334000 | 0.000000000  |                               |
|                               | 1                         | -0.804325000 | -0.493337000 | 0.000000000  |                               |
| NH <sub>3</sub>               | 7                         | -0.000002000 | 0.000006000  | -0.112438000 | -56.507545                    |
|                               | 1                         | 0.756439000  | 0.558301000  | 0.262360000  |                               |
|                               | 1                         | 0.105318000  | -0.934239000 | 0.262345000  |                               |
|                               | 1                         | -0.861744000 | 0.375899000  | 0.262363000  |                               |
| C <sub>3</sub> H <sub>8</sub> | 6                         | 1.263476000  | -0.260181000 | 0.000001000  | -118.976131                   |
|                               | 1                         | 1.296021000  | -0.904389000 | -0.880048000 |                               |
|                               | 1                         | 1.296026000  | -0.904370000 | 0.880064000  |                               |
|                               | 1                         | 2.164018000  | 0.353087000  | -0.000008000 |                               |
|                               | 6                         | 0.000000000  | 0.590503000  | -0.000004000 |                               |
|                               | 1                         | 0.000001000  | 1.245252000  | 0.873592000  |                               |
|                               | 1                         | -0.000001000 | 1.245239000  | -0.873610000 |                               |
|                               | 6                         | -1.263476000 | -0.260181000 | 0.000003000  |                               |
|                               | 1                         | -1.296023000 | -0.904372000 | 0.880064000  |                               |
|                               | 1                         | -2.164018000 | 0.353087000  | -0.000002000 |                               |
|                               | 1                         | -1.296023000 | -0.904386000 | -0.880048000 |                               |
|                               | 6                         | -0.308587000 | 1.207669000  | 0.015561000  |                               |
| PC1                           | 1                         | -0.152583000 | 1.623215000  | -0.969777000 | -174.811800                   |
|                               | 1                         | -0.449553000 | 1.900459000  | 0.832368000  |                               |
|                               | 7                         | 2.691349000  | -0.362017000 | -0.141845000 |                               |
|                               | 1                         | 3.648748000  | -0.068518000 | 0.006786000  |                               |
|                               | 1                         | 2.102926000  | 0.458289000  | -0.042638000 |                               |
|                               | 1                         | 2.450242000  | -0.986960000 | 0.617677000  |                               |
|                               | 6                         | -0.645574000 | -0.232603000 | 0.172937000  |                               |
|                               | 1                         | -0.030765000 | -0.830805000 | -0.502804000 |                               |
|                               | 1                         | -0.415153000 | -0.559858000 | 1.189090000  |                               |
|                               | 6                         | -2.127964000 | -0.516316000 | -0.116207000 |                               |
|                               | 1                         | -2.351221000 | -1.576727000 | 0.001291000  |                               |
|                               | 1                         | -2.768294000 | 0.046903000  | 0.562337000  |                               |
|                               | 1                         | -2.381043000 | -0.224378000 | -1.135156000 |                               |
|                               | 6                         | -0.968310000 | -0.034733000 | 0.535088000  |                               |
| PC2                           | 1                         | -1.344407000 | -0.063742000 | 1.548553000  | -174.817807                   |
|                               | 7                         | 2.316237000  | 0.107971000  | -0.075046000 |                               |
|                               | 7                         | 2.316237000  | 0.107971000  | -0.075046000 |                               |

|                                     |   |              |              |              |             |
|-------------------------------------|---|--------------|--------------|--------------|-------------|
|                                     | 1 | 2.992264000  | 0.771603000  | 0.281902000  |             |
|                                     | 1 | 1.497657000  | 0.157370000  | 0.523221000  |             |
|                                     | 1 | 2.715371000  | -0.814913000 | 0.044440000  |             |
|                                     | 6 | -1.020044000 | 1.246486000  | -0.218343000 |             |
|                                     | 1 | -0.994346000 | 2.112448000  | 0.441495000  |             |
|                                     | 1 | -0.182618000 | 1.316182000  | -0.917553000 |             |
|                                     | 1 | -1.936809000 | 1.320878000  | -0.818466000 |             |
|                                     | 6 | -0.794705000 | -1.312708000 | -0.205453000 |             |
|                                     | 1 | 0.016956000  | -1.228950000 | -0.932861000 |             |
|                                     | 1 | -0.581515000 | -2.148026000 | 0.460453000  |             |
|                                     | 1 | -1.697858000 | -1.572912000 | -0.773613000 |             |
| <b>1-C<sub>3</sub>H<sub>7</sub></b> | 6 | 1.291005000  | -0.295968000 | -0.030803000 | -118.301955 |
|                                     | 1 | 1.253682000  | -1.323573000 | 0.301316000  |             |
|                                     | 1 | 2.256924000  | 0.124488000  | -0.265278000 |             |
|                                     | 6 | 0.079131000  | 0.559145000  | 0.047056000  |             |
|                                     | 1 | 0.084035000  | 1.132861000  | 0.984318000  |             |
|                                     | 1 | 0.104775000  | 1.310207000  | -0.746964000 |             |
|                                     | 6 | -1.215614000 | -0.243828000 | -0.034624000 |             |
|                                     | 1 | -2.089907000 | 0.400774000  | 0.045078000  |             |
|                                     | 1 | -1.274210000 | -0.783789000 | -0.979606000 |             |
|                                     | 1 | -1.262428000 | -0.977063000 | 0.771363000  |             |
| <b>2-C<sub>3</sub>H<sub>7</sub></b> | 6 | -0.010621000 | 0.544145000  | 0.000000000  | -118.306601 |
|                                     | 1 | 0.229394000  | 1.597427000  | 0.000000000  |             |
|                                     | 6 | -0.010621000 | -0.199334000 | 1.286317000  |             |
|                                     | 1 | -0.169183000 | 0.457565000  | 2.139772000  |             |
|                                     | 1 | -0.789390000 | -0.967164000 | 1.295928000  |             |
|                                     | 1 | 0.939462000  | -0.725545000 | 1.450695000  |             |
|                                     | 6 | -0.010621000 | -0.199334000 | -1.286317000 |             |
|                                     | 1 | -0.789390000 | -0.967164000 | -1.295928000 |             |
|                                     | 1 | -0.169183000 | 0.457565000  | -2.139772000 |             |
|                                     | 1 | 0.939462000  | -0.725545000 | -1.450695000 |             |
| <b>TS1</b>                          | 6 | 0.124794000  | 1.103568000  | 0.291284000  | -174.781554 |
|                                     | 1 | 0.405876000  | 2.072867000  | -0.114306000 |             |
|                                     | 1 | 0.019340000  | 1.143431000  | 1.374625000  |             |
|                                     | 7 | 2.186075000  | -0.415658000 | -0.107336000 |             |
|                                     | 1 | 2.036895000  | -1.038678000 | 0.690190000  |             |
|                                     | 1 | 1.187991000  | 0.429254000  | 0.110039000  |             |
|                                     | 1 | 1.782206000  | -0.927313000 | -0.896131000 |             |
|                                     | 6 | -1.027558000 | 0.430991000  | -0.412696000 |             |
|                                     | 1 | -1.906477000 | 1.081729000  | -0.363146000 |             |
|                                     | 1 | -0.795278000 | 0.322323000  | -1.474601000 |             |
|                                     | 6 | -1.373479000 | -0.926499000 | 0.186524000  |             |
|                                     | 1 | -2.217901000 | -1.386408000 | -0.324990000 |             |
|                                     | 1 | -0.525313000 | -1.609130000 | 0.117467000  |             |
|                                     | 1 | -1.632407000 | -0.826832000 | 1.241535000  |             |
| <b>TS2</b>                          | 6 | 0.411455000  | 0.005075000  | 0.479369000  | -174.784657 |
|                                     | 1 | 0.538265000  | 0.011693000  | 1.562000000  |             |
|                                     | 7 | -2.145268000 | -0.057222000 | 0.042811000  |             |
|                                     | 1 | -2.204693000 | 0.885198000  | -0.351374000 |             |

|  |   |              |              |              |
|--|---|--------------|--------------|--------------|
|  | 1 | -0.836492000 | -0.030961000 | 0.382209000  |
|  | 1 | -2.059851000 | -0.659754000 | -0.779952000 |
|  | 6 | 0.923935000  | -1.263967000 | -0.157777000 |
|  | 1 | 0.484115000  | -2.149294000 | 0.299931000  |
|  | 1 | 0.695355000  | -1.280444000 | -1.225134000 |
|  | 1 | 2.010169000  | -1.338545000 | -0.056117000 |
|  | 6 | 0.887363000  | 1.281340000  | -0.171380000 |
|  | 1 | 0.642673000  | 1.287480000  | -1.235100000 |
|  | 1 | 0.437630000  | 2.161087000  | 0.287996000  |
|  | 1 | 1.973184000  | 1.379402000  | -0.085402000 |

**Table S3:** High-pressure rate constant,  $k_{\text{TST}}(T)$ , of  $\text{NH}_2 + \text{C}_3\text{H}_8$  reaction, including HIR and Eckart tunneling corrections. Units are in  $\text{cm}^3/\text{molecule/s}$ .

| T (K) | $k_{\text{TST}}(T)$ , $\text{cm}^3/\text{molecule/s}$ |          |          |
|-------|-------------------------------------------------------|----------|----------|
|       | via TS1                                               | via TS2  | k tot    |
| 300   | 1.65E-18                                              | 2.72E-17 | 2.89E-17 |
| 400   | 2.93E-17                                              | 2.67E-16 | 2.96E-16 |
| 500   | 2.68E-16                                              | 1.52E-15 | 1.79E-15 |
| 600   | 1.45E-15                                              | 5.71E-15 | 7.16E-15 |
| 700   | 5.46E-15                                              | 1.63E-14 | 2.18E-14 |
| 800   | 1.59E-14                                              | 3.83E-14 | 5.42E-14 |
| 900   | 3.87E-14                                              | 7.82E-14 | 1.17E-13 |
| 1000  | 8.20E-14                                              | 1.44E-13 | 2.26E-13 |
| 1100  | 1.57E-13                                              | 2.44E-13 | 4.01E-13 |
| 1200  | 2.76E-13                                              | 3.89E-13 | 6.65E-13 |
| 1300  | 4.55E-13                                              | 5.88E-13 | 1.04E-12 |
| 1400  | 7.12E-13                                              | 8.52E-13 | 1.56E-12 |
| 1500  | 1.06E-12                                              | 1.19E-12 | 2.25E-12 |
| 1600  | 1.53E-12                                              | 1.62E-12 | 3.15E-12 |
| 1700  | 2.14E-12                                              | 2.15E-12 | 4.29E-12 |
| 1800  | 2.90E-12                                              | 2.78E-12 | 5.68E-12 |
| 1900  | 3.85E-12                                              | 3.54E-12 | 7.39E-12 |
| 2000  | 5.00E-12                                              | 4.43E-12 | 9.43E-12 |

+  $k_{\text{NH}_3+\text{N-C}_3\text{H}_7}(T) = 2.19 \times 10^{-26} \times T^{4.52} \times \exp(-2346.7 \text{ K}/T)$  ( $T = 300 - 2000 \text{ K}$ ,  $\text{cm}^3/\text{molecule/s}$  and fitting error  $\sim 2.3 \%$ , via TS1)

+  $k_{\text{NH}_3+\text{I-C}_3\text{H}_7}(T) = 1.35 \times 10^{-24} \times T^{3.91} \times \exp(-1684.0 \text{ K}/T)$  ( $T = 300 - 2000 \text{ K}$ ,  $\text{cm}^3/\text{molecule/s}$  and fitting error  $\sim 1.5 \%$ , via TS2)

+  $k_{\text{tot}}(T) = 4.00 \times 10^{-26} \times T^{4.47} \times \exp(-1566.5 \text{ K}/T)$  ( $T = 300 - 2000 \text{ K}$ ,  $\text{cm}^3/\text{molecule/s}$  and fitting error  $\sim 1.6 \%$ )

**Table S4:** The calculated Eckart tunneling factor for the reactions of  $\text{NH}_2 + \text{C}_3\text{H}_8$  over the wide temperature range of 300 – 2000 K.

| <b>T (K)</b> | <b>via TS1</b> | <b>via TS2</b> |
|--------------|----------------|----------------|
| 300          | 36.80          | 18.50          |
| 400          | 6.17           | 4.64           |
| 500          | 3.05           | 2.61           |
| 600          | 2.14           | 1.94           |
| 700          | 1.75           | 1.63           |
| 800          | 1.54           | 1.46           |
| 900          | 1.41           | 1.35           |
| 1000         | 1.32           | 1.28           |
| 1100         | 1.27           | 1.23           |
| 1200         | 1.22           | 1.19           |
| 1300         | 1.19           | 1.17           |
| 1400         | 1.16           | 1.14           |
| 1500         | 1.14           | 1.13           |
| 1600         | 1.13           | 1.11           |
| 1700         | 1.11           | 1.10           |
| 1800         | 1.10           | 1.09           |
| 1900         | 1.09           | 1.08           |
| 2000         | 1.08           | 1.07           |



**Table S5:** The calculated rate constants with and without HIR corrections for the reactions of  $\text{NH}_2 + \text{C}_3\text{H}_8$  over the wide temperature range of 300 – 2000 K.

| T (K) | $k_{\text{tot}}$ (with HIR)<br>[cm <sup>3</sup> /molecule/s] | $k_{\text{tot}}$ (without HIR)<br>[cm <sup>3</sup> /molecule/s] | HIR factor<br>( $k_{\text{with\_HIR}}/k_{\text{without\_HIR}}$ ) |
|-------|--------------------------------------------------------------|-----------------------------------------------------------------|------------------------------------------------------------------|
| 300   | 2.89E-17                                                     | 1.82E-17                                                        | 1.59                                                             |
| 400   | 2.96E-16                                                     | 2.05E-16                                                        | 1.44                                                             |
| 500   | 1.79E-15                                                     | 1.34E-15                                                        | 1.34                                                             |
| 600   | 7.16E-15                                                     | 5.70E-15                                                        | 1.26                                                             |
| 700   | 2.18E-14                                                     | 1.83E-14                                                        | 1.19                                                             |
| 800   | 5.42E-14                                                     | 4.75E-14                                                        | 1.14                                                             |
| 900   | 1.17E-13                                                     | 1.06E-13                                                        | 1.10                                                             |
| 1000  | 2.26E-13                                                     | 2.13E-13                                                        | 1.06                                                             |
| 1100  | 4.01E-13                                                     | 3.89E-13                                                        | 1.03                                                             |
| 1200  | 6.65E-13                                                     | 6.64E-13                                                        | 1.00                                                             |
| 1300  | 1.04E-12                                                     | 1.07E-12                                                        | 0.98                                                             |
| 1400  | 1.56E-12                                                     | 1.64E-12                                                        | 0.95                                                             |
| 1500  | 2.25E-12                                                     | 2.43E-12                                                        | 0.93                                                             |
| 1600  | 3.15E-12                                                     | 3.46E-12                                                        | 0.91                                                             |
| 1700  | 4.29E-12                                                     | 4.81E-12                                                        | 0.89                                                             |
| 1800  | 5.68E-12                                                     | 6.51E-12                                                        | 0.87                                                             |
| 1900  | 7.39E-12                                                     | 8.62E-12                                                        | 0.86                                                             |
| 2000  | 9.43E-12                                                     | 1.12E-11                                                        | 0.84                                                             |

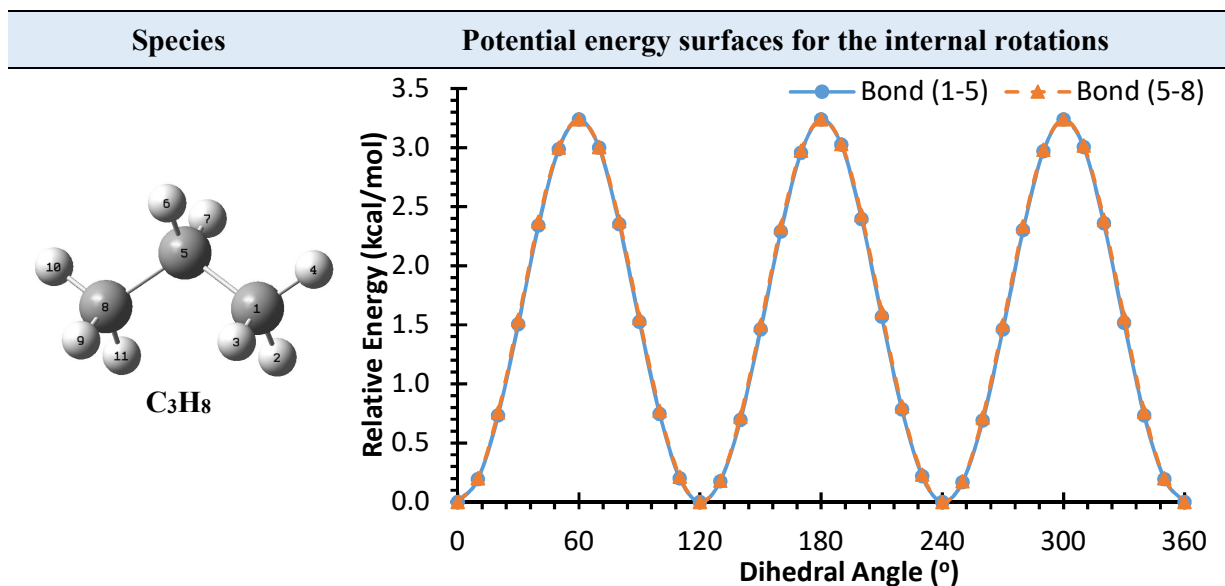

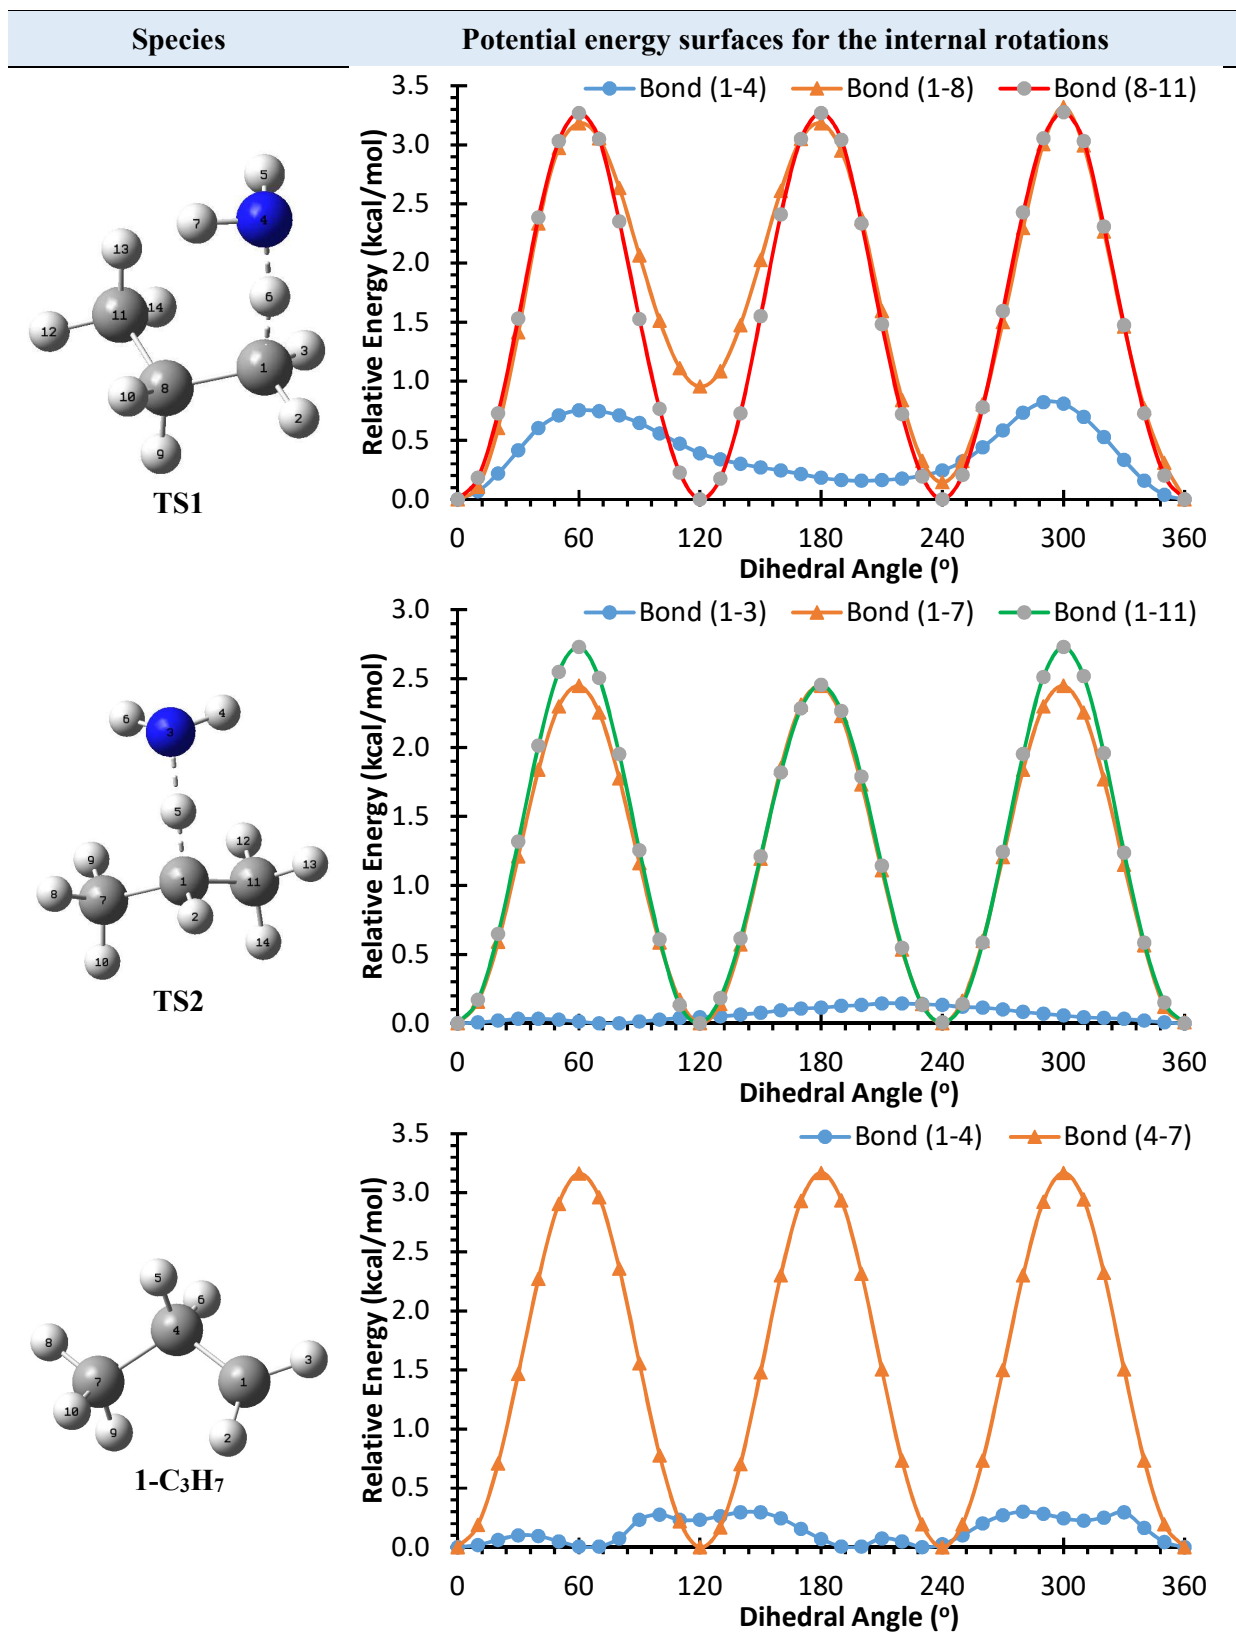

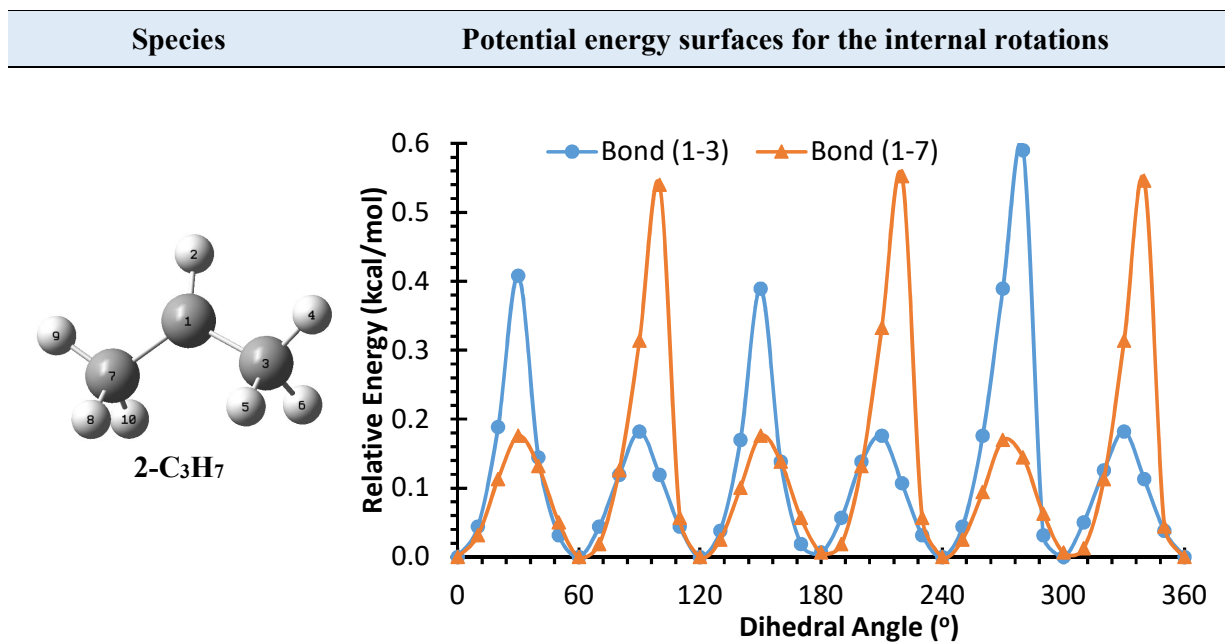

**Figure S1:** Hindrance potentials for the species involved in the  $\text{NH}_2 + \text{C}_3\text{H}_8$  reaction, calculated at M06-2X/cc-pVDZ level of theory.

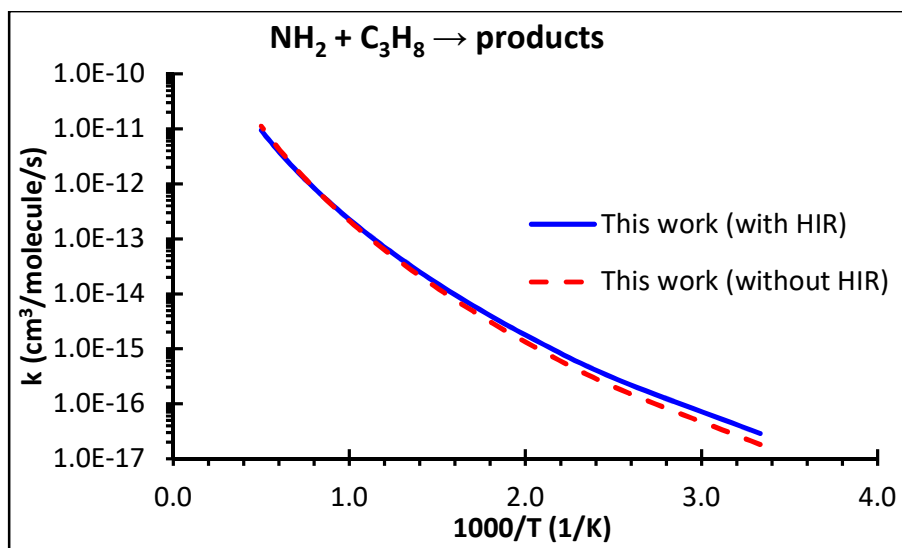

**Figure S2:** Predicted total rate constant for the reaction of  $\text{NH}_2 + \text{C}_3\text{H}_8 \rightarrow \text{products}$ , with (solid line) and without (dashed line) HIR treatment.

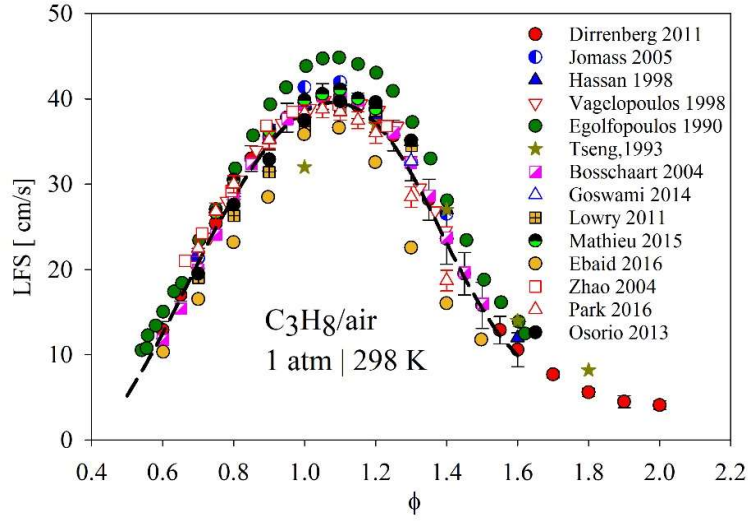

**Figure S3:** Laminar flame speed of  $\text{C}_3\text{H}_8/\text{air}$  at 1 atm and 298 K as a function of equivalence ratio. Symbols: experimental data from literature [2,3,12–14,4–11]. Line: model predictions from this work.

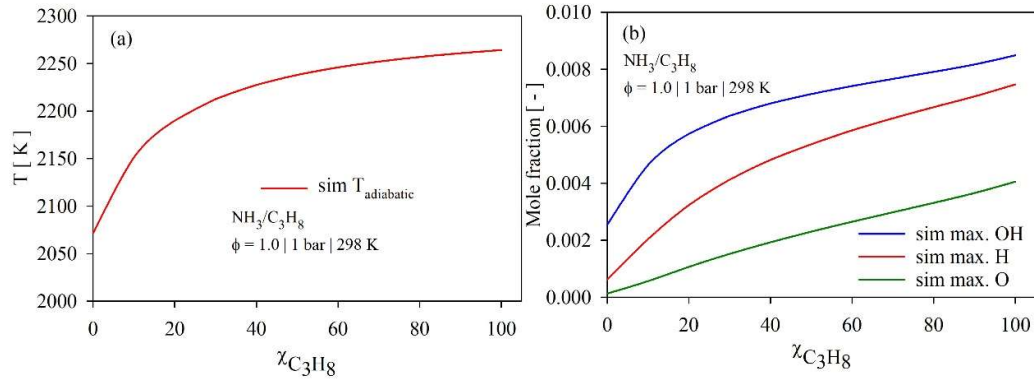

**Figure S4:** Model predicted adiabatic flame temperature (a) and maximum mole fraction of OH, H and O (b) at  $\phi = 1.0$ , 1 bar and 298 K as a function of  $\text{C}_3\text{H}_8$  mole fraction variation in the  $\text{NH}_3/\text{C}_3\text{H}_8$  blends for the flame condition shown in Fig. 5b in manuscript.

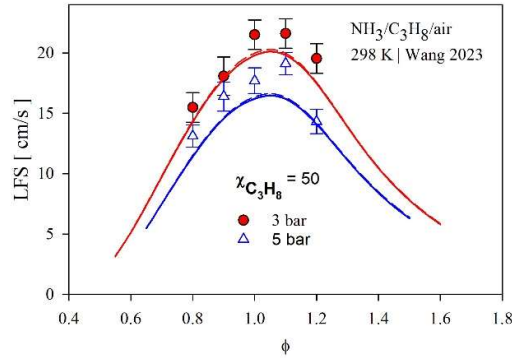

**Figure S5:** Laminar flame speed of  $\text{NH}_3$  50% /  $\text{C}_3\text{H}_8$  50 %/air at 3 and 5 bar at 298 K. Symbols: experimental data from literature [15]. Lines: model predictions from this work.

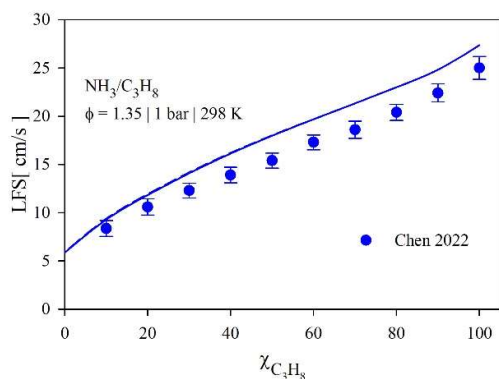

**Figure S6:** Laminar flame speed of  $\text{NH}_3/\text{C}_3\text{H}_8/\text{air}$  at varying  $\text{C}_3\text{H}_8$  content in fuel blend at  $\phi = 1.35$ , 1 bar and 298 K. Symbols: experimental data from literature [16]. Lines: model predictions from this work.

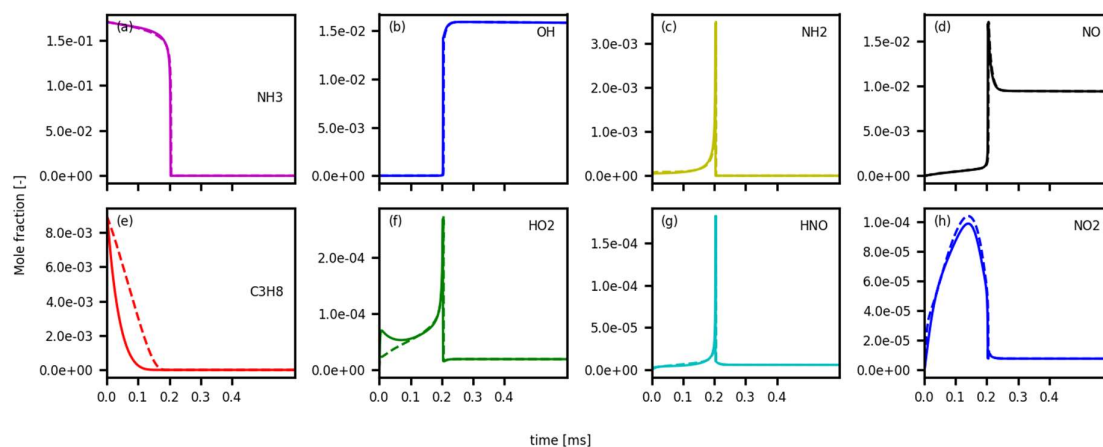

**Figure S7:** Main species profiles with and without the cross-reaction added in this study at 1400 K, 40 bar and  $\phi = 1.0$  for 95%  $\text{NH}_3$ /5% $\text{C}_3\text{H}_8$  /air blend. Solid lines: with cross-reactions, dashed lines: without cross-reactions.

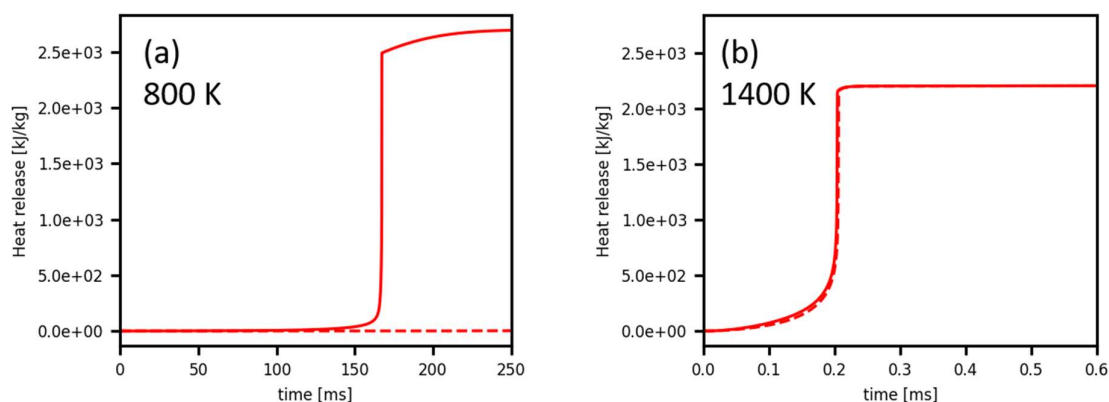

**Figure S8:** Heat release rate as a function of time at 800 K (a) and 1400 K (b), 40 bar and  $\phi = 1.0$  for 95%  $\text{NH}_3$ /5%  $\text{C}_3\text{H}_8$  /air blend. Solid lines: with cross-reactions, dashed lines: without cross-reactions.

## References

- [1] A.M. Mebel, Prediction of absolute rate constants for the reactions of  $\text{NH}_2$  with alkanes from ab initio G2M/TST calculations, *J. Phys. Chem. A*. 103 (1999) 2088–2096.
- [2] G. Jomaas, X.L. Zheng, D.L. Zhu, C.K. Law, Experimental determination of counterflow ignition temperatures and laminar flame speeds of C2 - C3 hydrocarbons at atmospheric and elevated pressures, *Proc. Combust. Inst.* 30 (2005) 193–200.
- [3] M.I. Hassan, K.T. Aung, G.M. Faeth, Measured and predicted properties of laminar premixed methane/air flames at various pressures, *Combust. Flame*. 115 (1998) 539–550.
- [4] L.-K. Tseng, M.A. Ismail, G.M. Faeth, Laminar Burning Velocities and Markstein Numbers of Hydrocarbon/Air Flames, *Combust. Flame*. 95 (1993) 410–426.
- [5] K.J. Bosschaart, L.P.H. De Goeij, The laminar burning velocity of flames propagating in mixtures of hydrocarbons and air measured with the heat flux method, *Combust. Flame*. 136 (2004) 261–269.
- [6] M. Goswami, Laminar Burning Velocities at Elevated Pressures using the Heat Flux Method, Eindhoven University of Technology, 2014.
- [7] W. Lowry, J. de Vries, M. Krejci, E. Petersen, Z. Serinyel, W. Metcalfe, H. Curran, G. Bourque, Laminar Flame Speed Measurements and Modeling of Pure Alkanes and Alkane Blends at Elevated Pressures, *J. Eng. Gas Turbines Power*. 133 (2011) 91501.
- [8] M.S.Y. Ebaid, K.J.M. Al-Khishali, Measurements of the laminar burning velocity for propane: Air mixtures, *Adv. Mech. Eng.* 8 (2016) 1–17.

- [9] O. Park, P.S. Veloo, D.A. Sheen, Y. Tao, F.N. Egolfopoulos, H. Wang, Chemical kinetic model uncertainty minimization through laminar flame speed measurements, *Combust. Flame*. 172 (2016) 136–152.
- [10] C.H. Osorio, A.J. Vissotski, E.L. Petersen, M.S. Mannan, Effect of CF<sub>3</sub>Br on C<sub>1</sub>-C<sub>3</sub> ignition and laminar flame speed: Numerical and experimental evaluation, *Combust. Flame*. 160 (2013) 1044–1059.
- [11] C.M. Vagelopoulos, F.N. Egolfopoulos, Direct experimental determination of laminar flame speeds, *Symp. Combust.* 27 (1998) 513–519.
- [12] F.N. Egolfopoulos, D.L. Zhu, C.K. Law, Experimental and numerical determination of laminar flame speeds: Mixtures of C<sub>2</sub> hydrocarbons with oxygen and nitrogen, *Symp. Combust.* 23 (1990) 471–478.
- [13] P. Dirrenberger, H. Le Gall, R. Bounaceur, O. Herbinet, P.A. Glaude, A. Konnov, F. Battin-Leclerc, Measurements of laminar flame velocity for components of natural gas, *Energy and Fuels*. 25 (2011) 3875–3884.
- [14] Z. Zhao, A. Kazakov, J. Li, F.L. Dryer, The initial temperature and N<sub>2</sub> dilution effect on the laminar flame speed of propane/air, *Combust. Sci. Technol.* 176 (2004) 1705–1723.
- [15] Z. Wang, C. Ji, D. Wang, T. Zhang, Y. Zhai, S. Wang, Experimental and numerical study on laminar burning velocity and premixed combustion characteristics of NH<sub>3</sub>/C<sub>3</sub>H<sub>8</sub>/air mixtures, *Fuel*. 331 (2023) 125936.
- [16] C. Chen, Z. Wang, Z. Yu, X. Han, Y. He, Y. Zhu, A.A. Konnov, Experimental and kinetic modeling study of laminar burning velocity enhancement by ozone additive in NH<sub>3</sub>+O<sub>2</sub>+N<sub>2</sub> and NH<sub>3</sub>+CH<sub>4</sub>/C<sub>2</sub>H<sub>6</sub>/C<sub>3</sub>H<sub>8</sub>+air flames, *Proc. Combust. Inst.* (2022).
